# Supplementary material
Source: PubMed Central journal article supplement (PMC5129878)
Supplement: cr201656x1.pdf [file cr201656x1.pdf]

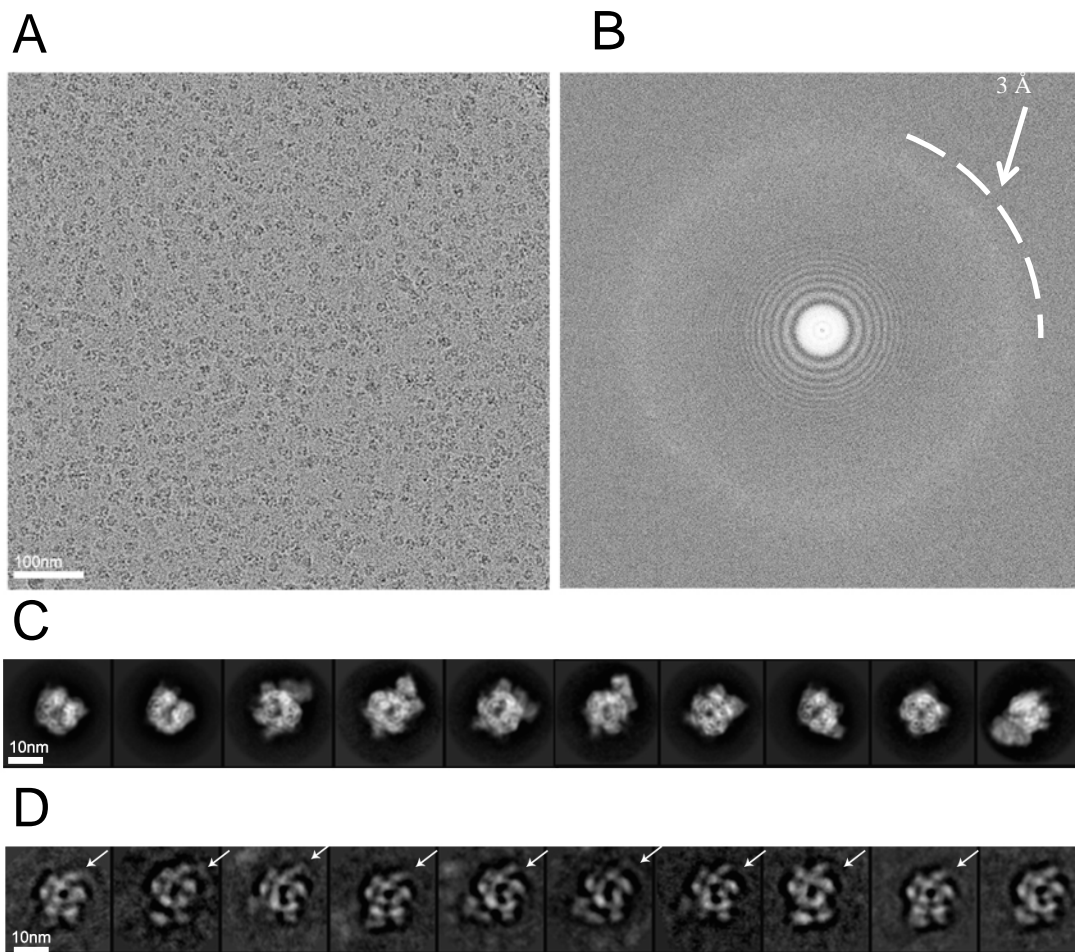

**Supplementary information, Figure S1. Cryo-EM image of the Exo10-Ski7**

(A) A typical micrograph of the Exo10-Ski7 complex collected on a Titan Krios with K2 camera. (B) Power spectrum of the micrograph in (A). The signal at 3 Angstrom resolution is labeled. (C) 2D class averages of the Exo10-Ski7 complexes calculated by RELION 1.3. (D) 2D class averages of the Exo10-Ski7 complexes in their side-views calculated by IMAGIC-4D. The arrows point to the potential Ski7 density.
