# Supplementary material
Source: PubMed Central journal article supplement (PMC5129878)
Supplement: cr201656x2.pdf [file cr201656x2.pdf]

**A**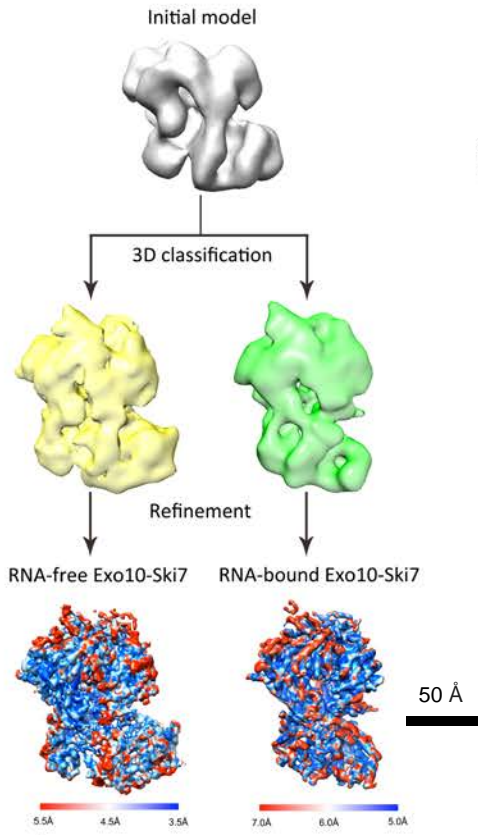**B**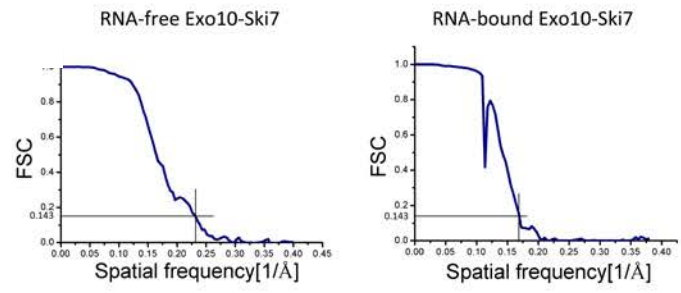**C**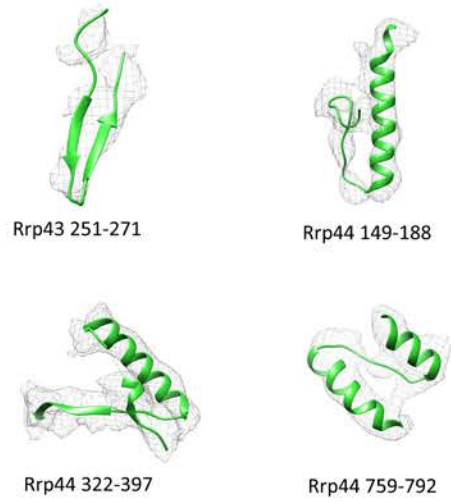**D**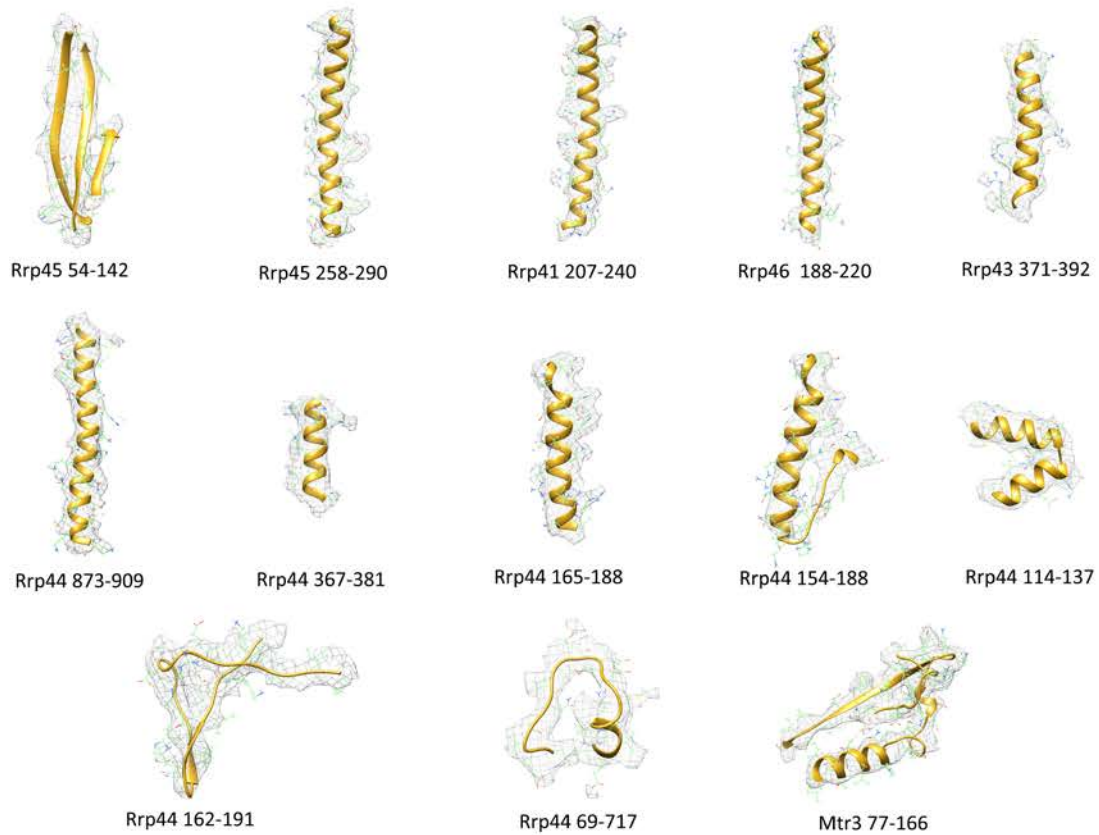

**Supplementary information, Figure S2. 3D reconstruction and atomic model building of the Exo10-Ski7**

(A) 3D reconstruction procedure of the Exo10-Ski7 complex by Cryo-EM. We used a low-pass filtered 3D reconstruction of the Exo10 complex obtained from negative staining EM as initial model to perform 3D classification of the Exo10-Ski7 complex in RELION 1.3, which generated two major classes of particles. Further refinement of the two classes led to two 3D reconstructions of the RNA-free Exo10-Ski7 and RNA-bound Exo10-Ski7 respectively. The refined models were presented with gradient color based on local resolution calculated by ResMap software. The resolution range was marked as gradient bar on the bottom of each corresponding model. (B) Gold-standard FSC curves of the two 3D reconstructions. The estimated resolution of the RNA-free Exo10-Ski7 was about 4.2 Angstrom at 0.143 criteria. The estimated resolution of the RNA-bound Exo10-Ski7 was about 5.8 Angstrom at 0.143 criteria. (C) Representative portions in the EM density map of the endogenous RNA-bound Exo10-Ski7, into which the Exo10 from atomic model 4IFD (PDB code) were docked as rigid body. The numbers of chain and sequence were marked under the corresponding portions. (D) Representative portions in the EM density map of the RNA-free Exo10-Ski7, into which the atomic model of the RNA-free Exo10 was built. Side chains were presented as green wires. The subunit and sequence number were marked under the corresponding portions.
