# Supplementary material
Source: PubMed Central journal article supplement (PMC5129878)
Supplement: cr201656x4.pdf [file cr201656x4.pdf]

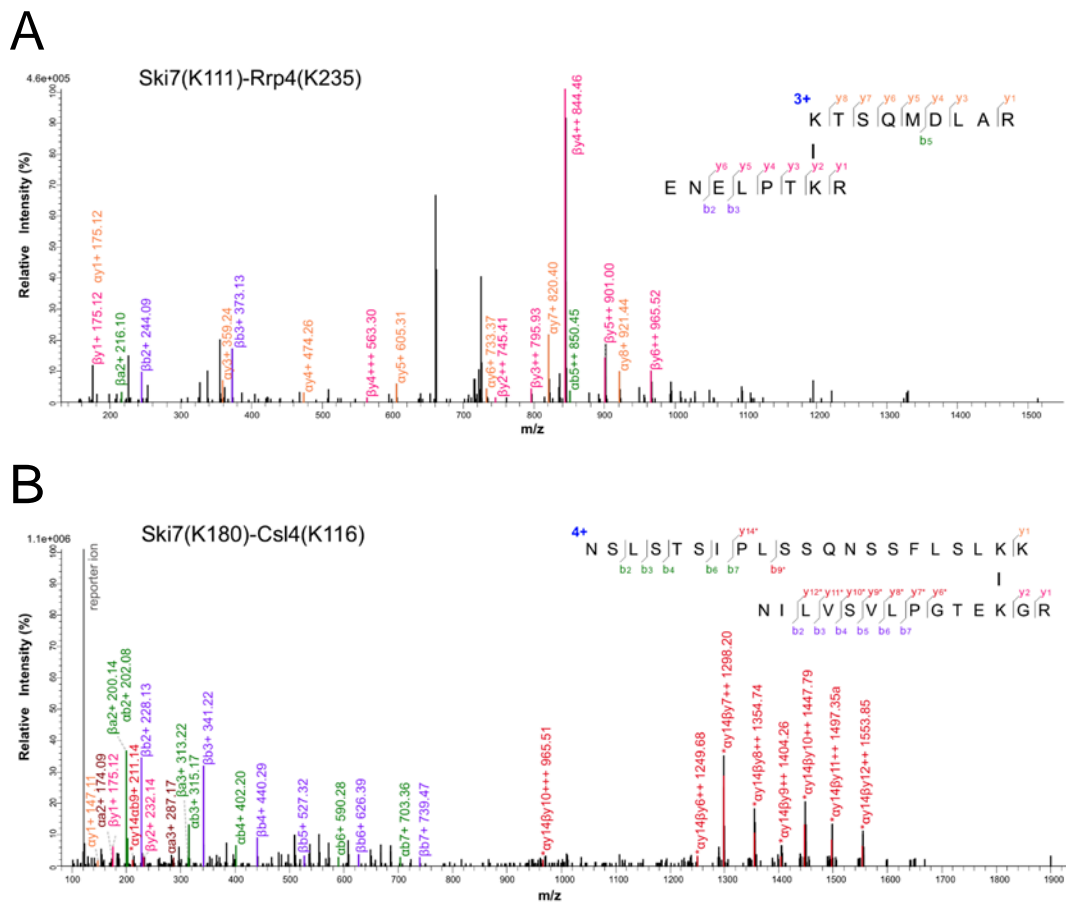

**Supplementary information, Figure S4. MS2 spectra of the two cross-linked peptides between the Ski7 and the Exo10**

(A) Ski7(K111)-Rrp4(K235) was identified with BS<sup>3</sup>. (B) Ski7(K180)-Csl4(K116) was identified with an in house-developed cross-linker called Leiker. The cross-linked residues in parentheses are numbered according to the Uniprot sequences. Cleavage at the peptide bonds results in y ions (C-terminal fragments) and b ions (N-terminal fragments). A further loss of carbonyl form b ions generates a ions. The y ions are colored orange if the cleavage occurs on the  $\alpha$  peptide (the one with a higher mass) or pink if the cleavage occurs on the  $\beta$  peptide (the one with a lower mass). The b ions are colored green for  $\alpha$  peptides or purple for  $\beta$  peptides. The a ions are colored brown. For the cross-linked peptide of Ski7(K180)-Csl4(K116), further fragmentation occurs in the  $\alpha$ y14 ions, giving rise to a series of internal y and b ions. They are highlighted with asterisks in the sequence and colored in red.
