# Supplementary material
Source: PubMed Central journal article supplement (PMC5129878)
Supplement: cr201656x5.pdf [file cr201656x5.pdf]

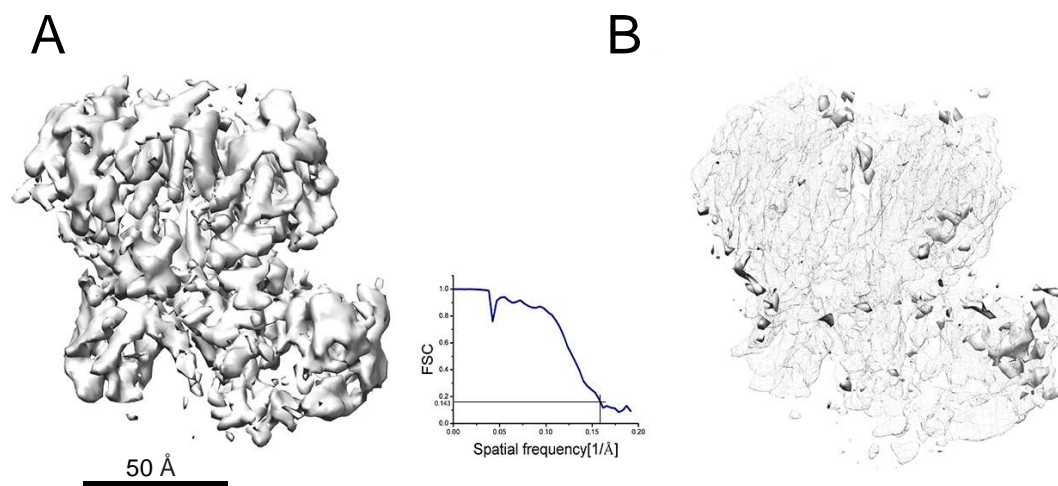

**Supplementary information, Figure S5. 3D reconstruction of the RNA-free Exo10**

(A) The 3D EM map of the RNA-free Exo10 at a resolution of 6.3 Angstrom indicated by the gold-standard FSC at 0.143 criteria. (B) Difference map (solid rendering) of the RNA-free Exo10 3D EM reconstruction (mesh rendering) subtracting the Exo10 atomic model built from the RNA-free Exo10-Ski7 3D map at 4.2 Angstrom resolution. The threshold of the difference density is at 6.5 sigma.
