# Supplementary material
Source: PubMed Central journal article supplement (PMC5129878)
Supplement: cr201656x7.pdf [file cr201656x7.pdf]

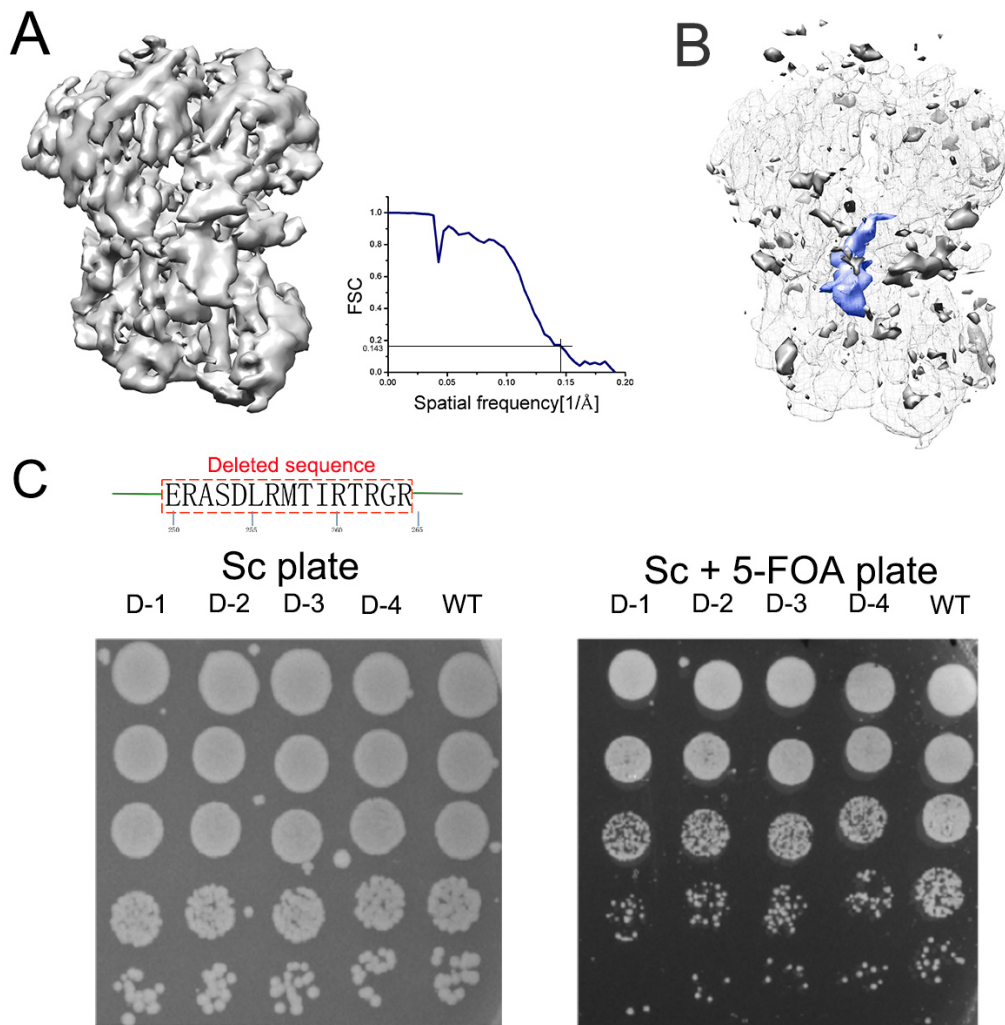

**Supplementary information, Figure S7. Function of the Rrp43 loop in RNA processing.** (A) The 3D reconstruction of the RNA-bound state complex from the  $Mg^{2+}$ -treated Exo10 incubated with RNA24 sample at 6.3 Angstrom indicated by the gold-standard FSC at 0.143 criteria. (B) Difference map (solid rendering) of the 3D EM reconstruction (mesh rendering) subtracting the Exo10 atomic model extracted from the model 4IFD (PDB code). The threshold of the difference density is at 9 sigma. (C) Yeast growth assay of the Rrp43 loop-deletion mutation. D-1 to D-4 are repeated strains with Rrp43 loop-deletion (aa 250-264). Wilde type (WT) is presented as control. The strains grew on SC and SC plus 5-FOA plates for 3 days at 30°C. The Sc plate is used as a control to show the yeast cells are equally spotted.
