# Supplementary material
Source: PubMed Central journal article supplement (PMC5129878)
Supplement: cr201656x8.pdf [file cr201656x8.pdf]

**Supplementary information, Table S1. Mass-spectrum ID results of the Exo10 sample.**

Only proteins with score larger than 30 are listed. Relative abundance was calculated by averaging PSMs (peptide-spectrum matches) by molecular weight. Rrp44 is used as normalization reference.

| Description                       | Score   | # Unique Peptides | # PSMs | MW [kDa] | Relative abundance |
|-----------------------------------|---------|-------------------|--------|----------|--------------------|
| Exosome complex exonuclease RRP44 | 1373.73 | 74                | 484    | 113.6    | 1.00               |
| Exosome complex component RRP4    | 825.27  | 30                | 273    | 39.4     | 1.63               |
| Exosome complex component SKI6    | 594.30  | 18                | 201    | 27.5     | 1.71               |
| Exosome complex component RRP45   | 454.76  | 24                | 149    | 33.9     | 1.03               |
| Exosome complex component RRP43   | 436.50  | 27                | 184    | 44.0     | 0.98               |
| Exosome complex component MTR3    | 430.26  | 14                | 137    | 27.6     | 1.17               |
| Exosome complex component RRP4    | 402.21  | 19                | 134    | 26.5     | 1.19               |
| Exosome complex component CSL4    | 383.13  | 20                | 146    | 31.6     | 1.09               |
| Exosome complex component RRP46   | 179.68  | 11                | 74     | 24.4     | 0.71               |
| Exosome complex component RRP42   | 146.27  | 11                | 70     | 29.0     | 0.57               |
| Superkiller protein 7             | 29.17   | 9                 | 11     | 84.7     | 0.03               |
