# Supplementary material
Source: PubMed Central journal article supplement (PMC5129878)
Supplement: cr201656x9.pdf [file cr201656x9.pdf]

**Supplementary information, Table S2. Mass-spectrum ID results of the Exo10-Ski7 sample.**

Only proteins with score larger than 30 are listed. Relative abundance was calculated by averaging PSMs (peptide-spectrum matches) by molecular weight. Rrp44 is used as normalization reference.

| Description                       | Score   | # Unique Peptides | # PSMs | MW [kDa] | Relative abundance |
|-----------------------------------|---------|-------------------|--------|----------|--------------------|
| Exosome complex exonuclease RRP44 | 1261.53 | 70                | 460    | 113.6    | 1.00               |
| Superkiller protein 7             | 1138.00 | 57                | 406    | 84.7     | 1.18               |
| Exosome complex component RRP4    | 581.24  | 29                | 205    | 39.4     | 1.28               |
| Exosome complex component CSL4    | 474.19  | 24                | 190    | 31.6     | 1.49               |
| Exosome complex component SKI6    | 426.11  | 16                | 141    | 27.5     | 1.26               |
| Exosome complex component RRP43   | 350.56  | 24                | 151    | 44.0     | 0.85               |
| Exosome complex component RRP45   | 337.28  | 21                | 119    | 33.9     | 0.87               |
| Exosome complex component RRP40   | 331.45  | 17                | 118    | 26.5     | 1.10               |
| Exosome complex component MTR3    | 296.62  | 12                | 100    | 27.6     | 0.90               |
| Exosome complex component RRP46   | 130.15  | 8                 | 54     | 24.4     | 0.55               |
| Exosome complex component RRP42   | 112.33  | 9                 | 53     | 29.0     | 0.45               |
