# Supplementary material
Source: PubMed Central journal article supplement (PMC5129878)
Supplement: cr201656x10.pdf [file cr201656x10.pdf]

**Supplementary information, Table S3. Summarized information of Cryo-EM data.**

| Sample                          | Microscope  | Camera | Particle numbers | Resolution | Notes                              |
|---------------------------------|-------------|--------|------------------|------------|------------------------------------|
| RNA-free Exo10-Ski7             | Titan Krios | K2     | 25,000           | 4.2 Å      | Auto-refined                       |
| RNA-bound Exo10-Ski7            | Titan krios | K2     | 35,000           | 5.8 Å      | Auto-refined                       |
| Mg <sup>2+</sup> -treated Exo10 | Titan krios | K2     | 50,000           | 11.5 Å     | No auto-refinement                 |
| Exo10-RNA18                     | Titan krios | K2     | 55,000           | 13 Å       | No auto-refinement                 |
| Exo10-RNA24                     | Titan krios | K2     | 62,000           | 6.7 Å      | Auto-refined with a binning of two |
| Exo10-RNA48                     | Titan krios | K2     | 45,000           | 11 Å       | No auto-refinement                 |
| Untreated Exo10                 | Titan krios | K2     | 36,000           | 6.3 Å      | Auto-refined with a binning of two |
